# Supplementary material
Source: publisher site journal article supplement (http://kjim.org/upload/media/kjim-2021-088-suppl6.pdf)
Supplement: Supplementary file 1 [file kjim-2021-088-suppl6.pdf]

**Supplementary Table 6. Rehospitalizations**

|                                 | HeartMate II | HVAD        | <i>p</i> value |
|---------------------------------|--------------|-------------|----------------|
| BTT/BTC (n = 30)                | 10           | 20          |                |
| Time to rehospitalization, day  | 38 (17–241)  | 29 (8–390)  | 0.488          |
| Rehospitalization within 1 year | 9 (90.0)     | 13 (65.0)   | 0.210          |
| DT (n = 20)                     | 7            | 13          |                |
| Time to rehospitalization, day  | 30 (28–53)   | 65 (39–246) | 0.570          |
| Rehospitalization within 1 year | 5 (71.4)     | 11 (84.6)   | 0.587          |

Values are presented as median (interquartile range) or number (%).

HVAD, HeartWare Ventricular Assist Device; BTT/BTC, bridge to transplantation/bridge to candidacy; DT, destination therapy.
